# Supplementary material
Source: publisher figshare collection journal article supplement (https://acs.figshare.com/ndownloader/files/9271162)
Supplement: Supplementary file 1 [file 9271162]

## *Supporting Information*

### **Fabrication of a Highly Tunable Graphene Oxide Composite through Layer-by-Layer Assembly of Highly Crystalline Polyaniline Nanofibers and Green Corrosion Inhibitors: Complementary Experimental and First-Principles Quantum Mechanics Modeling Approaches**

B. Ramezanzadeh,<sup>a,\*</sup> P. Kardar,<sup>a</sup> G. Bahlakeh,<sup>b</sup> Y. Hayatgheib,<sup>a</sup> M. Mahdavian<sup>a</sup>

a. Surface Coating and Corrosion Department, Institute for Color Science and Technology, Tehran, Iran

b. Department of Engineering and Technology, Golestan University, Aliabad Katool, Iran

\* ramezanzadeh-bh@icrc.ac.ir, ramezanzadeh@aut.ac.ir

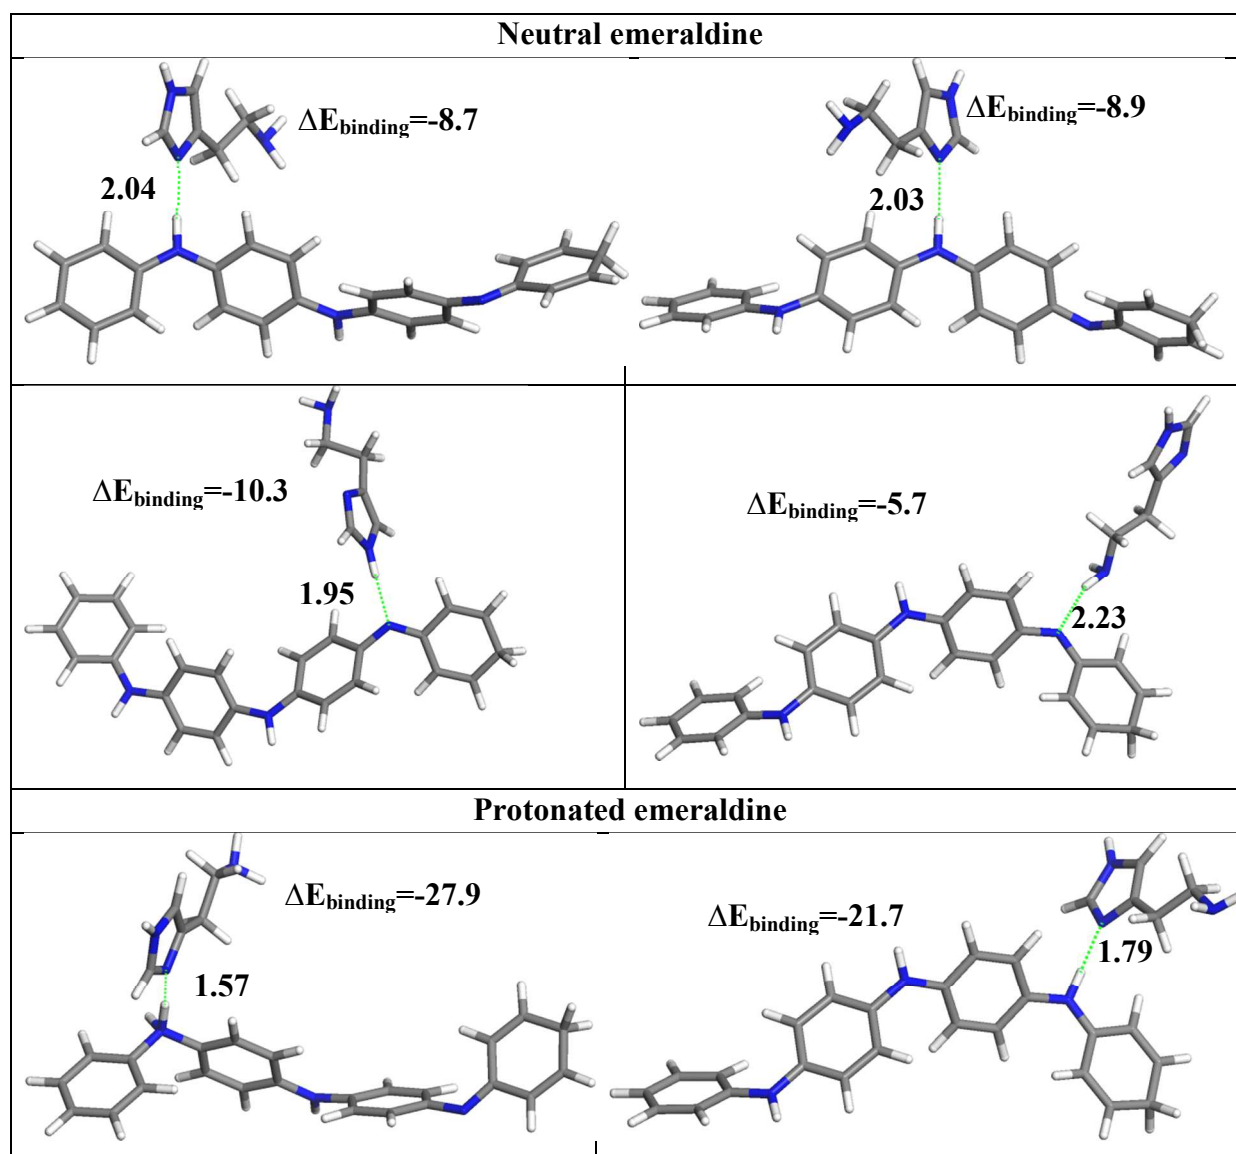

Figure S1- The B3LYP/6-31G(d,p) optimized hystamine interacting with phenyl-terminated neutral/protonated emeraldine trimer form of polyaniline. The calculated binding energies are in kcal/mol, and the H-bonds are in angstrom (Å). The binding energies and H-bond length for nitrogen-terminated emeraldine are shown in parentheses.
